# Supplementary material for: Identification of the WRKY gene family and the functional analysis of DoWRKY71 in yam (Dioscorea opposita Thunb.)
Source: Research Square preprint supplement (doi:10.21203/rs.3.rs-2164173/v1), 2022-10-18
Supplement: Supplementary file 1 [file 091537e0939e6f633607ca94.xlsx]

## Sheet: 4℃
	16624			Ct value of target gene	Ct value of reference gene
		0h	Ⅰ	27.0576	14.7359
			Ⅱ	26.6996	14.5144
			Ⅲ	26.6353	14.3709
		1h	Ⅰ	25.8241	14.5611
			Ⅱ	25.5897	14.3889
			Ⅲ	25.2912	14.626
		6h	Ⅰ	28.4191	14.1652
			Ⅱ	28.0547	14.4845
			Ⅲ	28.5026	14.1986
		12h	Ⅰ	29.3035	14.0866
			Ⅱ	29.8037	14.2726
			Ⅲ	29.9407	14.1728
		24h	Ⅰ	30.4921	14.9301
			Ⅱ	29.7957	14.3548
			Ⅲ	30.0974	14.0785
	18388			Ct value of target gene	Ct value of reference gene
		0h	Ⅰ	24.0306	14.7359
			Ⅱ	24.2098	14.5144
			Ⅲ	24.1953	14.3709
		1h	Ⅰ	26.2644	14.5611
			Ⅱ	25.9514	14.3889
			Ⅲ	26.0944	14.626
		6h	Ⅰ	26.0413	14.1652
			Ⅱ	25.9871	14.4845
			Ⅲ	25.634	14.1986
		12h	Ⅰ	26.296	14.0866
			Ⅱ	26.2137	14.2726
			Ⅲ	26.497	14.1728
		24h	Ⅰ	26.994	14.9301
			Ⅱ	26.5491	14.3548
			Ⅲ	26.377	14.0785
	20283			Ct value of target gene	Ct value of reference gene
		0h	Ⅰ	23.4207	14.7359
			Ⅱ	23.3767	14.5144
			Ⅲ	23.3402	14.3709
		1h	Ⅰ	24.1823	14.5611
			Ⅱ	24.0608	14.3889
			Ⅲ	24.8513	14.626
		6h	Ⅰ	25.9459	14.1652
			Ⅱ	26.3199	14.4845
			Ⅲ	25.9155	14.1986
		12h	Ⅰ	26.8272	14.0866
			Ⅱ	27.0671	14.2726
			Ⅲ	27.0127	14.1728
		24h	Ⅰ	25.0266	14.9301
			Ⅱ	25.133	14.3548
			Ⅲ	25.241	14.0785
	22495			Ct value of target gene	Ct value of reference gene
		0h	Ⅰ	23.661	14.7359
			Ⅱ	23.6551	14.5144
			Ⅲ	23.6916	14.3709
		1h	Ⅰ	21.3092	14.5611
			Ⅱ	21.2426	14.3889
			Ⅲ	21.2129	14.626
		6h	Ⅰ	23.7256	14.1652
			Ⅱ	23.3103	14.4845
			Ⅲ	23.5085	14.1986
		12h	Ⅰ	24.4182	14.0866
			Ⅱ	24.9179	14.2726
			Ⅲ	25.0675	14.1728
		24h	Ⅰ	26.0195	14.9301
			Ⅱ	25.3271	14.3548
			Ⅲ	25.5154	14.0785
	29812			Ct value of target gene	Ct value of reference gene
		0h	Ⅰ	28.7477	14.7359
			Ⅱ	29.1274	14.5144
			Ⅲ	29.1301	14.3709
		1h	Ⅰ	30.2094	14.5611
			Ⅱ	30.0449	14.3889
			Ⅲ	30.4658	14.626
		6h	Ⅰ	30.6006	14.1652
			Ⅱ	30.8798	14.4845
			Ⅲ	30.688	14.1986
		12h	Ⅰ	31.0401	14.0866
			Ⅱ	30.8279	14.2726
			Ⅲ	31.0228	14.1728
		24h	Ⅰ	31.4427	14.9301
			Ⅱ	31.2869	14.3548
			Ⅲ	31.0065	14.0785
	23159			Ct value of target gene	Ct value of reference gene
		0h	Ⅰ	23.5527	14.7359
			Ⅱ	23.349	14.5144
			Ⅲ	22.7701	14.3709
		1h	Ⅰ	25.4089	14.5611
			Ⅱ	25.5198	14.3889
			Ⅲ	25.1033	14.626
		6h	Ⅰ	21.239	14.1652
			Ⅱ	21.6387	14.4845
			Ⅲ	21.509	14.1986
		12h	Ⅰ	24.6251	14.0866
			Ⅱ	25.34	14.2726
			Ⅲ	24.5747	14.1728
		24h	Ⅰ	26.0628	14.9301
			Ⅱ	25.2813	14.3548
			Ⅲ	25.2093	14.0785
	31596			Ct value of target gene	Ct value of reference gene
		0h	Ⅰ	22.3294	14.7359
			Ⅱ	22.6706	14.5144
			Ⅲ	22.9569	14.3709
		1h	Ⅰ	24.5229	14.5611
			Ⅱ	24.3976	14.3889
			Ⅲ	24.674	14.626
		6h	Ⅰ	25.0987	14.1652
			Ⅱ	25.0115	14.4845
			Ⅲ	25.2965	14.1986
		12h	Ⅰ	25.382	14.0866
			Ⅱ	25.4647	14.2726
			Ⅲ	25.6376	14.1728
		24h	Ⅰ	24.753	14.9301
			Ⅱ	24.5786	14.3548
			Ⅲ	24.4857	14.0785
	32736			Ct value of target gene	Ct value of reference gene
		0h	Ⅰ	27.5491	14.7359
			Ⅱ	27.4882	14.5144
			Ⅲ	27.3178	14.3709
		1h	Ⅰ	28.6965	14.5611
			Ⅱ	28.3836	14.3889
			Ⅲ	28.6793	14.626
		6h	Ⅰ	26.0313	14.1652
			Ⅱ	26.3888	14.4845
			Ⅲ	25.9214	14.1986
		12h	Ⅰ	26.7203	14.0866
			Ⅱ	27.0718	14.2726
			Ⅲ	26.8721	14.1728
		24h	Ⅰ	29.092	14.9301
			Ⅱ	28.5718	14.3548
			Ⅲ	28.4721	14.0785

## Sheet: ABA
	16624			Ct value of target gene	Ct value of reference gene
		0h	Ⅰ	26.4289	14.4923
			Ⅱ	26.2937	14.279
			Ⅲ	26.4363	14.4926
		1h	Ⅰ	27.2688	14.2637
			Ⅱ	27.5161	14.6765
			Ⅲ	27.7973	14.9754
		6h	Ⅰ	28.0295	14.0914
			Ⅱ	27.9899	14.2213
			Ⅲ	27.5408	14.0543
		12h	Ⅰ	27.1079	14.1029
			Ⅱ	27.6949	14.5923
			Ⅲ	27.7339	14.9026
		24h	Ⅰ	26.365	14.1419
			Ⅱ	26.4431	14.3242
			Ⅲ	26.5721	14.4587
	18388			Ct value of target gene	Ct value of reference gene
		0h	Ⅰ	23.0757	14.4923
			Ⅱ	23.0757	14.279
			Ⅲ	23.4458	14.4926
		1h	Ⅰ	23.0953	14.2637
			Ⅱ	23.5079	14.6765
			Ⅲ	23.7451	14.9754
		6h	Ⅰ	24.5341	14.0914
			Ⅱ	24.7513	14.2213
			Ⅲ	24.7388	14.0543
		12h	Ⅰ	23.0953	14.1029
			Ⅱ	23.7079	14.5923
			Ⅲ	23.5451	14.9026
		24h	Ⅰ	24.9218	14.1419
			Ⅱ	25.2524	14.3242
			Ⅲ	25.2795	14.4587
	20283			Ct value of target gene	Ct value of reference gene
		0h	Ⅰ	23.3599	14.4923
			Ⅱ	23.7262	14.279
			Ⅲ	23.6485	14.4926
		1h	Ⅰ	25.0789	14.2637
			Ⅱ	25.4804	14.6765
			Ⅲ	25.339	14.9754
		6h	Ⅰ	25.8349	14.0914
			Ⅱ	25.77	14.2213
			Ⅲ	25.6335	14.0543
		12h	Ⅰ	26.4042	14.1029
			Ⅱ	27.3275	14.5923
			Ⅲ	27.045	14.9026
		24h	Ⅰ	27.8513	14.1419
			Ⅱ	27.1041	14.3242
			Ⅲ	27.1702	14.4587
	22495			Ct value of target gene	Ct value of reference gene
		0h	Ⅰ	22.7613	14.4923
			Ⅱ	22.8766	14.279
			Ⅲ	23.098	14.4926
		1h	Ⅰ	25.4267	14.2637
			Ⅱ	25.2099	14.6765
			Ⅲ	25.629	14.9754
		6h	Ⅰ	25.4576	14.0914
			Ⅱ	25.7304	14.2213
			Ⅲ	25.0349	14.0543
		12h	Ⅰ	24.2382	14.1029
			Ⅱ	24.5121	14.5923
			Ⅲ	24.7477	14.9026
		24h	Ⅰ	25.8858	14.1419
			Ⅱ	25.6336	14.3242
			Ⅲ	25.7858	14.4587
	29812			Ct value of target gene	Ct value of reference gene
		0h	Ⅰ	25.492	14.4923
			Ⅱ	25.2684	14.279
			Ⅲ	25.4303	14.4926
		1h	Ⅰ	24.1511	14.2637
			Ⅱ	24.4692	14.6765
			Ⅲ	24.7866	14.9754
		6h	Ⅰ	25.4343	14.0914
			Ⅱ	25.5796	14.2213
			Ⅲ	25.3716	14.0543
		12h	Ⅰ	25.3552	14.1029
			Ⅱ	25.6702	14.5923
			Ⅲ	25.938	14.9026
		24h	Ⅰ	26.2234	14.1419
			Ⅱ	26.3893	14.3242
			Ⅲ	26.485	14.4587
	23159			Ct value of target gene	Ct value of reference gene
		0h	Ⅰ	26.7043	14.4923
			Ⅱ	26.4395	14.279
			Ⅲ	26.5415	14.4926
		1h	Ⅰ	24.4594	14.2637
			Ⅱ	24.7123	14.6765
			Ⅲ	24.8433	14.9754
		6h	Ⅰ	26.284	14.0914
			Ⅱ	26.2023	14.2213
			Ⅲ	26.1892	14.0543
		12h	Ⅰ	28.3214	14.1029
			Ⅱ	28.6949	14.5923
			Ⅲ	28.9173	14.9026
		24h	Ⅰ	29.3948	14.1419
			Ⅱ	29.3271	14.3242
			Ⅲ	29.5172	14.4587
	31596			Ct value of target gene	Ct value of reference gene
		0h	Ⅰ	29.0694	14.4923
			Ⅱ	28.9794	14.279
			Ⅲ	29.2611	14.4926
		1h	Ⅰ	30.3316	14.2637
			Ⅱ	30.4202	14.6765
			Ⅲ	30.6384	14.9754
		6h	Ⅰ	32.4883	14.0914
			Ⅱ	32.4077	14.2213
			Ⅲ	33.2475	14.0543
		12h	Ⅰ	32.4883	14.1029
			Ⅱ	32.4077	14.5923
			Ⅲ	33.2475	14.9026
		24h	Ⅰ	31.4653	14.1419
			Ⅱ	31.687	14.3242
			Ⅲ	31.4874	14.4587
	32736			Ct value of target gene	Ct value of reference gene
		0h	Ⅰ	28.526	14.4923
			Ⅱ	28.2779	14.279
			Ⅲ	28.5393	14.4926
		1h	Ⅰ	26.2814	14.2637
			Ⅱ	26.6852	14.6765
			Ⅲ	26.9209	14.9754
		6h	Ⅰ	25.0225	14.0914
			Ⅱ	25.2102	14.2213
			Ⅲ	25.1016	14.0543
		12h	Ⅰ	25.0285	14.1029
			Ⅱ	25.5359	14.5923
			Ⅲ	25.8055	14.9026
		24h	Ⅰ	26.2914	14.1419
			Ⅱ	26.3914	14.3242
			Ⅲ	26.4914	14.4587

## Sheet: MeJA
	16624			Ct value of target gene	Ct value of reference gene
		0h	Ⅰ	27.3107	14.0271
			Ⅱ	27.6471	14.5387
			Ⅲ	27.2643	14.1225
		1h	Ⅰ	27.506	14.6651
			Ⅱ	27.2054	14.4756
			Ⅲ	26.8565	14.2721
		6h	Ⅰ	30.629	14.7489
			Ⅱ	30.2065	14.2881
			Ⅲ	30.596	14.1664
		12h	Ⅰ	28.7599	14.0143
			Ⅱ	29.2234	14.5912
			Ⅲ	29.0259	14.9956
		24h	Ⅰ	30.8218	14.476
			Ⅱ	30.6049	14.6781
			Ⅲ	30.6328	14.4005
	18388			Ct value of target gene	Ct value of reference gene
		0h	Ⅰ	29.1676	14.0271
			Ⅱ	29.6869	14.5387
			Ⅲ	29.1324	14.1225
		1h	Ⅰ	26.7776	14.6651
			Ⅱ	26.5247	14.4756
			Ⅲ	26.4019	14.2721
		6h	Ⅰ	30.6344	14.7489
			Ⅱ	30.0002	14.2881
			Ⅲ	29.872	14.1664
		12h	Ⅰ	27.3337	14.0143
			Ⅱ	27.9671	14.5912
			Ⅲ	28.2643	14.9956
		24h	Ⅰ	30.4308	14.476
			Ⅱ	30.705	14.6781
			Ⅲ	30.5478	14.4005
	20283			Ct value of target gene	Ct value of reference gene
		0h	Ⅰ	27.0472	14.0271
			Ⅱ	27.6118	14.5387
			Ⅲ	27.1159	14.1225
		1h	Ⅰ	24.6808	14.6651
			Ⅱ	24.4644	14.4756
			Ⅲ	24.2759	14.2721
		6h	Ⅰ	26.7048	14.7489
			Ⅱ	26.2595	14.2881
			Ⅲ	26.1699	14.1664
		12h	Ⅰ	24.1707	14.0143
			Ⅱ	24.7068	14.5912
			Ⅲ	25.0052	14.9956
		24h	Ⅰ	26.4066	14.476
			Ⅱ	26.7129	14.6781
			Ⅲ	26.4083	14.4005
	22495			Ct value of target gene	Ct value of reference gene
		0h	Ⅰ	29.1517	14.0271
			Ⅱ	29.5001	14.5387
			Ⅲ	29.1595	14.1225
		1h	Ⅰ	26.6277	14.6651
			Ⅱ	26.5059	14.4756
			Ⅲ	26.2703	14.2721
		6h	Ⅰ	29.7417	14.7489
			Ⅱ	29.2672	14.2881
			Ⅲ	29.1132	14.1664
		12h	Ⅰ	28.0578	14.0143
			Ⅱ	28.5367	14.5912
			Ⅲ	29.0045	14.9956
		24h	Ⅰ	27.5171	14.476
			Ⅱ	27.777	14.6781
			Ⅲ	27.4157	14.4005
	29812			Ct value of target gene	Ct value of reference gene
		0h	Ⅰ	25.0575	14.0271
			Ⅱ	25.5999	14.5387
			Ⅲ	25.1475	14.1225
		1h	Ⅰ	23.689	14.6651
			Ⅱ	23.5212	14.4756
			Ⅲ	23.2679	14.2721
		6h	Ⅰ	24.9225	14.7489
			Ⅱ	24.3467	14.2881
			Ⅲ	24.2006	14.1664
		12h	Ⅰ	22.0271	14.0143
			Ⅱ	22.5761	14.5912
			Ⅲ	22.9337	14.9956
		24h	Ⅰ	24.5066	14.476
			Ⅱ	24.7228	14.6781
			Ⅲ	24.3899	14.4005
	23159			Ct value of target gene	Ct value of reference gene
		0h	Ⅰ	23.161	14.0271
			Ⅱ	23.6551	14.5387
			Ⅲ	23.1916	14.1225
		1h	Ⅰ	24.6092	14.6651
			Ⅱ	24.4426	14.4756
			Ⅲ	23.9129	14.2721
		6h	Ⅰ	25.7256	14.7489
			Ⅱ	25.3103	14.2881
			Ⅲ	25.2085	14.1664
		12h	Ⅰ	26.0182	14.0143
			Ⅱ	25.9675	14.5912
			Ⅲ	26.6179	14.9956
		24h	Ⅰ	26.4195	14.476
			Ⅱ	26.6271	14.6781
			Ⅲ	26.5154	14.4005
	31596			Ct value of target gene	Ct value of reference gene
		0h	Ⅰ	23.261	14.0271
			Ⅱ	23.6551	14.5387
			Ⅲ	23.2916	14.1225
		1h	Ⅰ	24.6092	14.6651
			Ⅱ	24.4426	14.4756
			Ⅲ	24.3129	14.2721
		6h	Ⅰ	25.7256	14.7489
			Ⅱ	25.3103	14.2881
			Ⅲ	25.5085	14.1664
		12h	Ⅰ	26.1182	14.0143
			Ⅱ	26.7179	14.5912
			Ⅲ	27.2675	14.9956
		24h	Ⅰ	26.4195	14.476
			Ⅱ	26.5271	14.6781
			Ⅲ	26.5154	14.4005
	32736			Ct value of target gene	Ct value of reference gene
		0h	Ⅰ	23.061	14.0271
			Ⅱ	23.6551	14.5387
			Ⅲ	23.1916	14.1225
		1h	Ⅰ	22.7092	14.6651
			Ⅱ	22.4426	14.4756
			Ⅲ	22.3129	14.2721
		6h	Ⅰ	24.7256	14.7489
			Ⅱ	24.3103	14.2881
			Ⅲ	24.3085	14.1664
		12h	Ⅰ	25.1182	14.0143
			Ⅱ	25.6179	14.5912
			Ⅲ	25.9675	14.9956
		24h	Ⅰ	25.6195	14.476
			Ⅱ	26.0271	14.6781
			Ⅲ	25.5154	14.4005
