# Supplementary material for: Identification of the WRKY gene family and the functional analysis of DoWRKY71 in yam (Dioscorea opposita Thunb.)
Source: Research Square preprint supplement (doi:10.21203/rs.3.rs-2164173/v1), 2022-10-18
Supplement: Supplementary file 2 [file 90e011a9288354e85ff9db1e.xlsx]

## Sheet: Sheet1
	4℃			Ct value of target gene	Ct value of reference gene			ABA			Ct value of target gene	Ct value of reference gene
		0h	Ⅰ	28.1599	13.0709				0h	Ⅰ	27.5683	13.0709
			Ⅱ	28.3081	13.0288					Ⅱ	27.3726	13.0288
			Ⅲ	27.9838	13.0521					Ⅲ	27.4233	13.0521
		1h	Ⅰ	28.4437	13.4124				1h	Ⅰ	28.2834	13.4124
			Ⅱ	28.6588	13.4095					Ⅱ	28.5457	13.4095
			Ⅲ	28.6833	13.3068					Ⅲ	28.3475	13.3068
		6h	Ⅰ	29.7891	13.2472				6h	Ⅰ	30.3937	13.2472
			Ⅱ	29.7885	13.2962					Ⅱ	30.2832	13.2962
			Ⅲ	29.5076	13.3319					Ⅲ	30.2729	13.3319
		12h	Ⅰ	30.0105	13.5859				12h	Ⅰ	29.7832	13.5859
			Ⅱ	30.6535	13.5059					Ⅱ	30.2416	13.5059
			Ⅲ	30.6845	13.8731					Ⅲ	29.8194	13.8731
		24h	Ⅰ	30.364	13.5148				24h	Ⅰ	29.3864	13.5148
			Ⅱ	30.3473	13.6137					Ⅱ	28.8197	13.6137
			Ⅲ	30.4691	13.3863					Ⅲ	29.2243	13.3863
