# Supplementary material for: Identification of the WRKY gene family and the functional analysis of DoWRKY71 in yam (Dioscorea opposita Thunb.)
Source: Research Square preprint supplement (doi:10.21203/rs.3.rs-2164173/v1), 2022-10-18
Supplement: Supplementary file 3 [file b9e8897fe7626029bf474d6e.xlsx]

## Sheet: Sheet1
	16624			Ct value of target gene	Ct value of reference gene			18388			Ct value of target gene	Ct value of reference gene
		90	Ⅰ	22.491	14.4345				90	Ⅰ	26.4448	14.4345
			Ⅱ	22.5545	14.5589					Ⅱ	26.6924	14.5589
			Ⅲ	22.3449	14.3461					Ⅲ	26.3701	14.3461
		105	Ⅰ	21.6471	14.5882				105	Ⅰ	25.7801	14.5882
			Ⅱ	21.6042	14.6555					Ⅱ	25.9926	14.6555
			Ⅲ	21.508	14.5394					Ⅲ	25.8576	14.5394
		120	Ⅰ	24.1312	14.4256				120	Ⅰ	26.3086	14.4256
			Ⅱ	24.0453	14.3564					Ⅱ	26.4376	14.3564
			Ⅲ	24.0976	14.2564					Ⅲ	26.1878	14.2564
		135	Ⅰ	23.5331	14.4432				135	Ⅰ	25.427	14.4432
			Ⅱ	23.6851	14.5608					Ⅱ	25.5874	14.5608
			Ⅲ	23.4176	14.4129					Ⅲ	25.4094	14.4129
		150	Ⅰ	23.5642	14.5101				150	Ⅰ	25.5474	14.5101
			Ⅱ	23.306	14.3525					Ⅱ	25.3972	14.3525
			Ⅲ	23.4377	14.4064					Ⅲ	25.2751	14.4064
		165	Ⅰ	22.9009	14.3202				165	Ⅰ	24.7612	14.3202
			Ⅱ	22.7163	14.2215					Ⅱ	24.5436	14.2215
			Ⅲ	22.8769	14.2027					Ⅲ	24.5415	14.2027
	20283			Ct value of target gene	Ct value of reference gene			22495			Ct value of target gene	Ct value of reference gene
		90	Ⅰ	26.4189	14.4345				90	Ⅰ	23.4425	14.4345
			Ⅱ	26.6459	14.5589					Ⅱ	23.5089	14.5589
			Ⅲ	26.3708	14.3461					Ⅲ	23.4377	14.3461
		105	Ⅰ	27.746	14.5882				105	Ⅰ	22.7679	14.5882
			Ⅱ	27.678	14.6555					Ⅱ	22.8323	14.6555
			Ⅲ	27.6024	14.5394					Ⅲ	22.6465	14.5394
		120	Ⅰ	26.5236	14.4256				120	Ⅰ	23.2849	14.4256
			Ⅱ	26.4536	14.3564					Ⅱ	23.2849	14.3564
			Ⅲ	26.2536	14.2564					Ⅲ	23.2249	14.2564
		135	Ⅰ	26.4372	14.4432				135	Ⅰ	24.466	14.4432
			Ⅱ	26.6961	14.5608					Ⅱ	24.5315	14.5608
			Ⅲ	26.4099	14.4129					Ⅲ	24.5251	14.4129
		150	Ⅰ	26.7472	14.5101				150	Ⅰ	22.585	14.5101
			Ⅱ	26.5446	14.3525					Ⅱ	22.5422	14.3525
			Ⅲ	26.6735	14.4064					Ⅲ	22.441	14.4064
		165	Ⅰ	27.7266	14.3202				165	Ⅰ	23.3936	14.3202
			Ⅱ	27.6061	14.2215					Ⅱ	23.3166	14.2215
			Ⅲ	27.6944	14.2027					Ⅲ	23.2078	14.2027
	29812			Ct value of target gene	Ct value of reference gene			23159			Ct value of target gene	Ct value of reference gene
		90	Ⅰ	27.4927	14.4345				90	Ⅰ	23.661	14.4345
			Ⅱ	27.6119	14.5589					Ⅱ	23.6551	14.5589
			Ⅲ	27.4985	14.3461					Ⅲ	23.4916	14.3461
		105	Ⅰ	26.9781	14.5882				105	Ⅰ	23.092	14.5882
			Ⅱ	26.9932	14.6555					Ⅱ	23.1026	14.6555
			Ⅲ	26.973	14.5394					Ⅲ	23.1129	14.5394
		120	Ⅰ	27.2493	14.4256				120	Ⅰ	24.556	14.4256
			Ⅱ	27.2877	14.3564					Ⅱ	24.3103	14.3564
			Ⅲ	27.2788	14.2564					Ⅲ	24.3085	14.2564
		135	Ⅰ	26.6868	14.4432				135	Ⅰ	23.4182	14.4432
			Ⅱ	26.7641	14.5608					Ⅱ	23.5179	14.5608
			Ⅲ	26.5088	14.4129					Ⅲ	23.4675	14.4129
		150	Ⅰ	26.552	14.5101				150	Ⅰ	23.4195	14.5101
			Ⅱ	26.4471	14.3525					Ⅱ	23.2271	14.3525
			Ⅲ	26.4417	14.4064					Ⅲ	23.3154	14.4064
		165	Ⅰ	26.8759	14.3202				165	Ⅰ	22.6768	14.3202
			Ⅱ	26.72	14.2215					Ⅱ	22.6723	14.2215
			Ⅲ	26.7613	14.2027					Ⅲ	22.5952	14.2027
	31596			Ct value of target gene	Ct value of reference gene			32736			Ct value of target gene	Ct value of reference gene
		90	Ⅰ	23.561	14.4345				90	Ⅰ	23.561	14.4345
			Ⅱ	23.6551	14.5589					Ⅱ	23.6551	14.5589
			Ⅲ	23.4916	14.3461					Ⅲ	23.4916	14.3461
		105	Ⅰ	23.4092	14.5882				105	Ⅰ	23.6092	14.5882
			Ⅱ	23.4426	14.6555					Ⅱ	23.7426	14.6555
			Ⅲ	23.3129	14.5394					Ⅲ	23.6129	14.5394
		120	Ⅰ	22.7256	14.4256				120	Ⅰ	23.456	14.4256
			Ⅱ	22.6103	14.3564					Ⅱ	23.4103	14.3564
			Ⅲ	22.6085	14.2564					Ⅲ	23.3085	14.2564
		135	Ⅰ	21.4182	14.4432				135	Ⅰ	22.6182	14.4432
			Ⅱ	21.5179	14.5608					Ⅱ	22.7179	14.5608
			Ⅲ	21.4275	14.4129					Ⅲ	22.5675	14.4129
		150	Ⅰ	21.6195	14.5101				150	Ⅰ	22.5195	14.5101
			Ⅱ	21.4271	14.3525					Ⅱ	22.3271	14.3525
			Ⅲ	21.5154	14.4064					Ⅲ	22.4154	14.4064
		165	Ⅰ	22.4333	14.3202				165	Ⅰ	23.1057	14.3202
			Ⅱ	22.3364	14.2215					Ⅱ	23.0729	14.2215
			Ⅲ	22.2647	14.2027					Ⅲ	23.0665	14.2027
