# Supplementary material for: Identification of the WRKY gene family and the functional analysis of DoWRKY71 in yam (Dioscorea opposita Thunb.)
Source: Research Square preprint supplement (doi:10.21203/rs.3.rs-2164173/v1), 2022-10-18
Supplement: Supplementary file 4 [file ba96694e14a2188af40496f6.xlsx]

## Sheet: Soluble protein
		protein content/ug	0	20	40	60	80	100
		OD=595	0	0.13	0.25	0.38	0.489	0.59
		ABA Trentment	OD=595nm
		WT-0	0.2634
			0.25
			0.259
		T-0	0.3124
			0.3371
			0.3267
		WT-1	0.227
			0.238
			0.232
		T-1	0.298
			0.286
			0.292
		WT-6	0.203
			0.172
			0.187
		T-6	0.241
			0.232
			0.238
		WT-12	0.215
			0.22
			0.218
		T-12	0.312
			0.281
			0.29
		WT-24	0.292
			0.281
			0.286
		T-24	0.351
			0.334
			0.342

## Sheet: SOD
		OD=560nm	Control
	WT-0	0.293	0.393
		0.296	0.393
		0.294	0.393
	T-0	0.293	0.393
		0.288	0.393
		0.289	0.393
	WT-1	0.279	0.393
		0.283	0.393
		0.28	0.393
	T-1	0.264	0.393
		0.261	0.393
		0.262	0.393
	WT-6	0.242	0.393
		0.247	0.393
		0.245	0.393
	T-6	0.209	0.393
		0.212	0.393
		0.21	0.393
	WT-12	0.214	0.393
		0.222	0.393
		0.218	0.393
	T-12	0.168	0.393
		0.162	0.393
		0.165	0.393
	WT-24	0.227	0.393
		0.232	0.393
		0.228	0.393
	T-24	0.211	0.393
		0.204	0.393
		0.206	0.393

## Sheet: POD
	Standard liquid concentration	OD
	0	0.048
	8.4	0.078
	16.9	0.112
	33.8	0.177
	50.6	0.246
	67.5	0.311
		ABA处理	OD=470nm	Control
		WT-0	0.472	0.047
			0.464	0.049
			0.468	0.048
		T-0	0.492	0.052
			0.479	0.048
			0.482	0.05
		WT-1	0.48	0.048
			0.484	0.049
			0.481	0.048
		T-1	0.5	0.051
			0.504	0.052
			0.502	0.051
		WT-6	0.558	0.051
			0.542	0.058
			0.547	0.054
		T-6	0.693	0.059
			0.701	0.053
			0.698	0.056
		WT-12	0.622	0.062
			0.631	0.052
			0.629	0.057
		T-12	0.728	0.057
			0.733	0.051
			0.731	0.054
		WT-24	0.696	0.061
			0.679	0.064
			0.683	0.061
		T-24	0.77	0.046
			0.742	0.048
			0.765	0.046

## Sheet: GA
	Standard liquid concentration nmol/L	0	7.5	15	30	60	120
	OD	0.2967	0.3764	0.4524	0.5727	0.7644	1.1404
		OD=490nm
	WT-0	0.6061
		0.6189
		0.606868
	T-0	0.598
		0.6028
		0.606768
	WT-1	0.6802
		0.6956
		0.676377
	T-1	0.6495
		0.6291
		0.616768
	WT-6	0.6601
		0.6693
		0.676565
	T-6	0.6124
		0.6266
		0.636779
	WT-12	0.7354
		0.7459
		0.727667
	T-12	0.6796
		0.6771
		0.685446
	WT-24	0.7109
		0.7014
		0.706455
	T-24	0.6601
		0.6448
		0.653465

## Sheet: ABA
	Standard nmol/L	0	5	10	20	40	80
	OD	0.2708	0.3466	0.4077	0.5157	0.7907	1.1956
		OD=490nm
	WT-0	0.7176
		0.7264
		0.707658
	T-0	0.7487
		0.7207
		0.736787
	WT-1	0.7701
		0.7344
		0.745679
	T-1	0.7622
		0.7779
		0.776357
	WT-6	0.8357
		0.8155
		0.826779
	T-6	0.8546
		0.8706
		0.865652
	WT-12	0.7742
		0.7852
		0.765678
	T-12	0.7938
		0.8155
		0.806768
	WT-24	0.7228
		0.7381
		0.716799
	T-24	0.7471
		0.758
		0.765688
