# Supplementary material for: Identification of the WRKY gene family and the functional analysis of DoWRKY71 in yam (Dioscorea opposita Thunb.)
Source: Research Square preprint supplement (doi:10.21203/rs.3.rs-2164173/v1), 2022-10-18
Supplement: Supplementary file 5 [file f2bdd95f1d7ea91fd07fc357.xlsx]

## Sheet: Chlorophyll content
	4℃	WT	WT	WT	T	T	T
	0h	11.6	11.3	11.4	11.76	11.96	11.62
	1h	11.21	11.2	11.421	11.12	11.34	11.38
	6h	8.61	8.5	8.37	9.2	9.4	9.7
	12h	7.9	7.5	7.7	9.13	9.04	9.17
	24h	7.1	7.2	7.2	8.03	8.26	8.16

## Sheet: Soluble protein
		protein content/ug	0	20	40	60	80	100
		OD=595	0	0.13	0.25	0.38	0.489	0.59
	4℃	OD=595nm
	WT-0	0.254
		0.297
		0.276
	T-0	0.3124
		0.3371
		0.32
	WT-1	0.257
		0.245
		0.249
	T-1	0.3103
		0.321
		0.316
	WT-6	0.231
		0.243
		0.236
	T-6	0.274
		0.293
		0.282
	WT-12	0.225
		0.214
		0.221
	T-12	0.247
		0.2179
		0.224
	WT-24	0.312
		0.281
		0.293
	T-24	0.34
		0.351
		0.342

## Sheet: SOD
	4℃	OD=560nm	Control
	WT-0	0.292	0.393
		0.29	0.393
		0.29	0.393
	T-0	0.2918	0.393
		0.289	0.393
		0.288	0.393
	WT-1	0.274	0.393
		0.283	0.393
		0.278	0.393
	T-1	0.269	0.393
		0.265	0.393
		0.267	0.393
	WT-6	0.257	0.393
		0.251	0.393
		0.254	0.393
	T-6	0.202	0.393
		0.208	0.393
		0.206	0.393
	WT-12	0.229	0.393
		0.231	0.393
		0.23	0.393
	T-12	0.178	0.393
		0.171	0.393
		0.173	0.393
	WT-24	0.226	0.393
		0.228	0.393
		0.228	0.393
	T-24	0.186	0.393
		0.19	0.393
		0.187	0.393

## Sheet: POD
	Standard liquid concentration	OD
	0	0.048
	8.4	0.078
	16.9	0.112
	33.8	0.177
	50.6	0.246
	67.5	0.311
	4℃	OD=470nm	Control
	WT-0	0.469	0.067
		0.463	0.059
		0.467	0.06
	T-0	0.486	0.05
		0.476	0.047
		0.481	0.049
	WT-1	0.481	0.045
		0.477	0.05
		0.478	0.048
	T-1	0.4921	0.052
		0.504	0.054
		0.496	0.053
	WT-6	0.55	0.066
		0.541	0.054
		0.544	0.057
	T-6	0.606	0.048
		0.589	0.053
		0.593	0.05
	WT-12	0.556	0.047
		0.538	0.049
		0.542	0.048
	T-12	0.708	0.063
		0.7185	0.055
		0.716	0.059
	WT-24	0.649	0.051
		0.675	0.054
		0.653	0.052
	T-24	0.729	0.051
		0.7366	0.051
		0.732	0.05

## Sheet: MDA
	4℃	OD=532nm	OD=600nm	OD=450nm
	WT-0	0.302	0.178	0.384
		0.286	0.172	0.363
		0.291	0.174	0.372
	T-0	0.294	0.181	0.362
		0.302	0.179	0.373
		0.296	0.179	0.367
	WT-1	0.308	0.167	0.367
		0.309	0.162	0.36
		0.307	0.165	0.362
	T-1	0.318	0.174	0.387
		0.312	0.182	0.363
		0.316	0.178	0.372
	WT-6	0.387	0.162	0.286
		0.391	0.168	0.244
		0.389	0.164	0.275
	T-6	0.312	0.175	0.223
		0.313	0.184	0.245
		0.313	0.178	0.238
	WT-12	0.377	0.141	0.208
		0.382	0.135	0.213
		0.379	0.138	0.209
	T-12	0.315	0.175	0.256
		0.304	0.164	0.276
		0.31	0.168	0.259
	WT-24	0.376	0.153	0.378
		0.368	0.173	0.3424
		0.369	0.167	0.365
	T-24	0.3175	0.187	0.38
		0.312	0.171	0.399
		0.315	0.175	0.386
